# Supplementary material for: A complete, multi-level conformational clustering of antibody complementarity-determining regions
Source: PeerJ journal article supplement (doi:10.7717/peerj.456), 2014-07-01

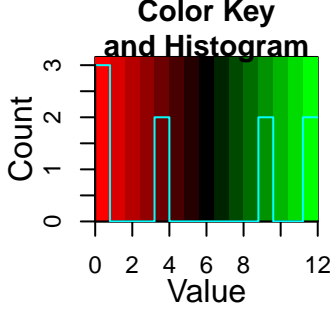

# H1-15residues

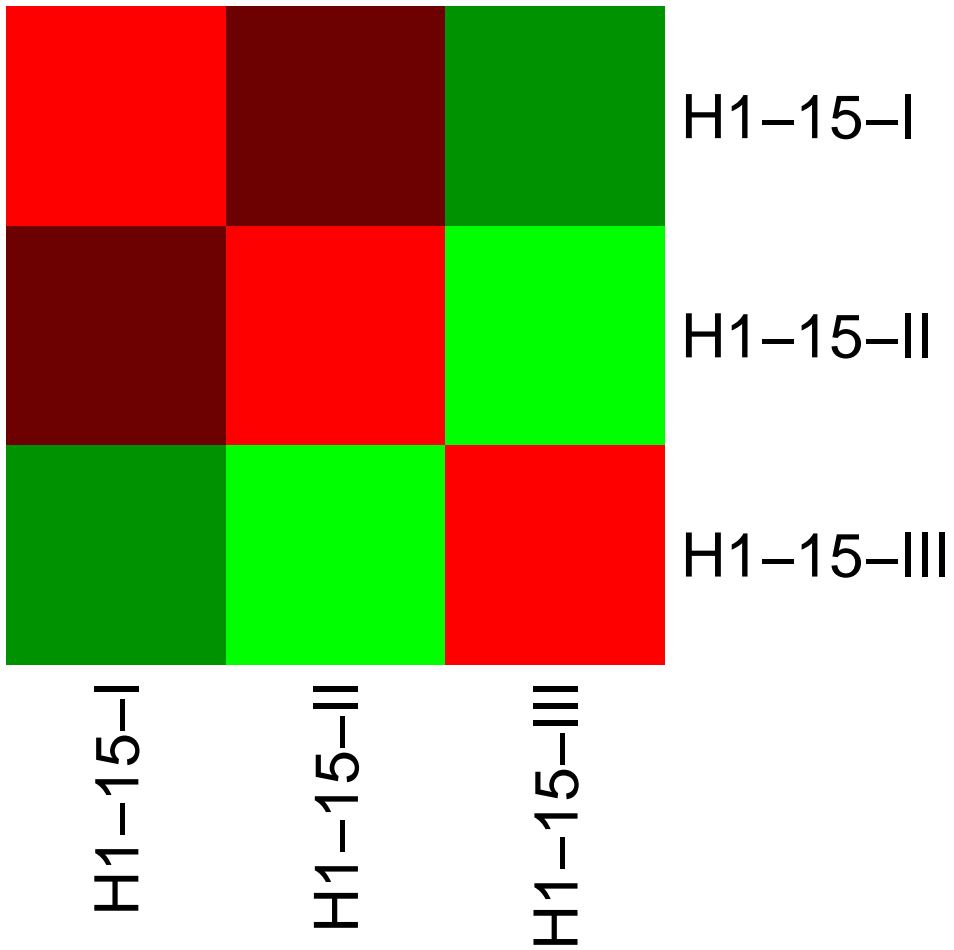

Color Key  
and Histogram

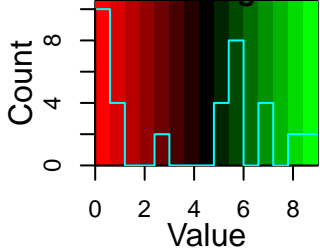

## H2-9residues

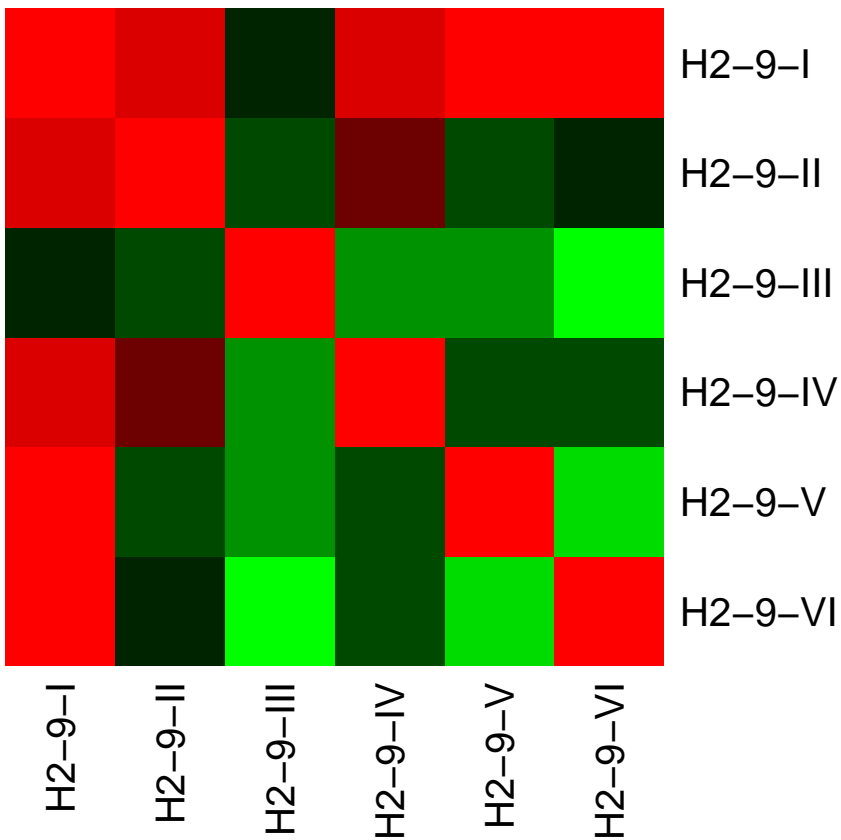

Color Key  
and Histogram

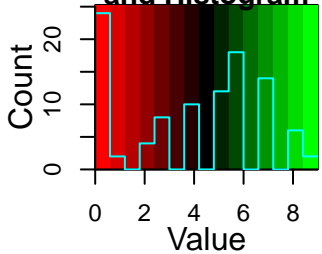

# H2-10residues

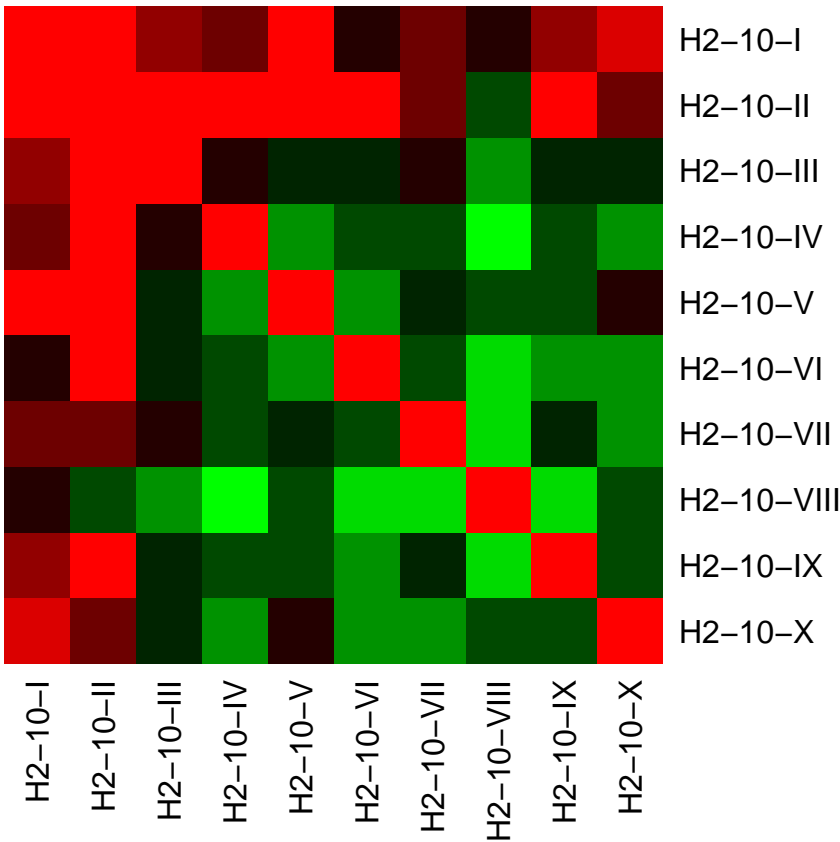

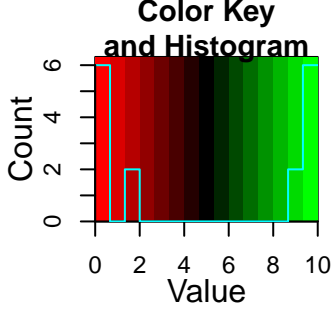

## H2-12residues

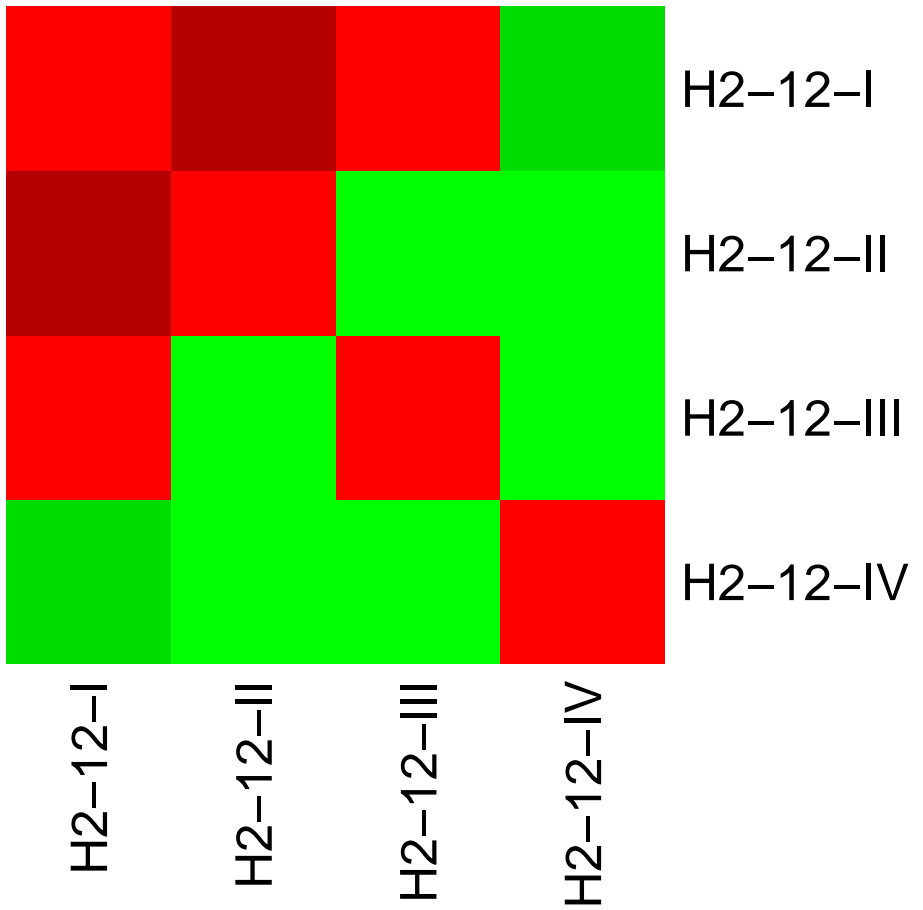

Color Key  
and Histogram

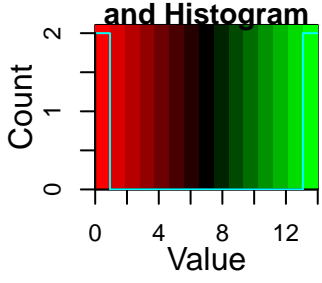

# H2-15residues

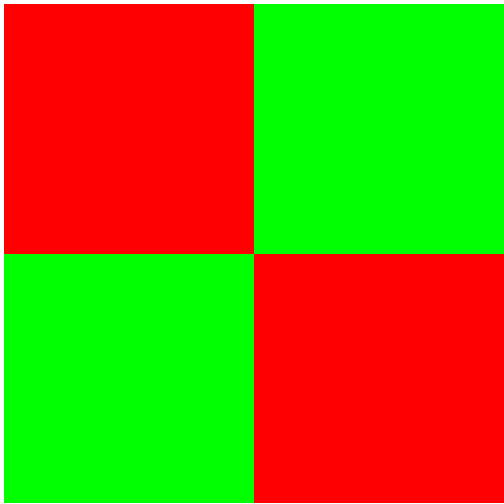

H2-15-I

H2-15-II

H2--15-I

H2--15-II

Color Key  
and Histogram

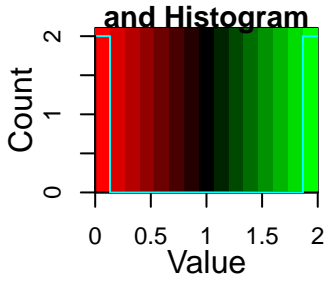

## H3-4residues

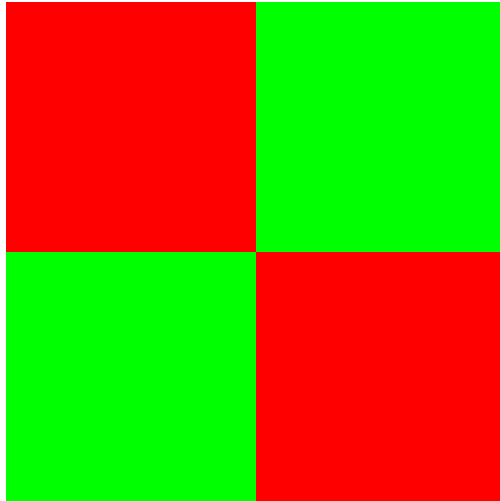

H3-4-I

H3-4-II

H3-4-I

H3-4-II

### Color Key and Histogram

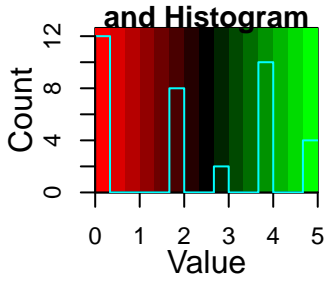

## H3-5residues

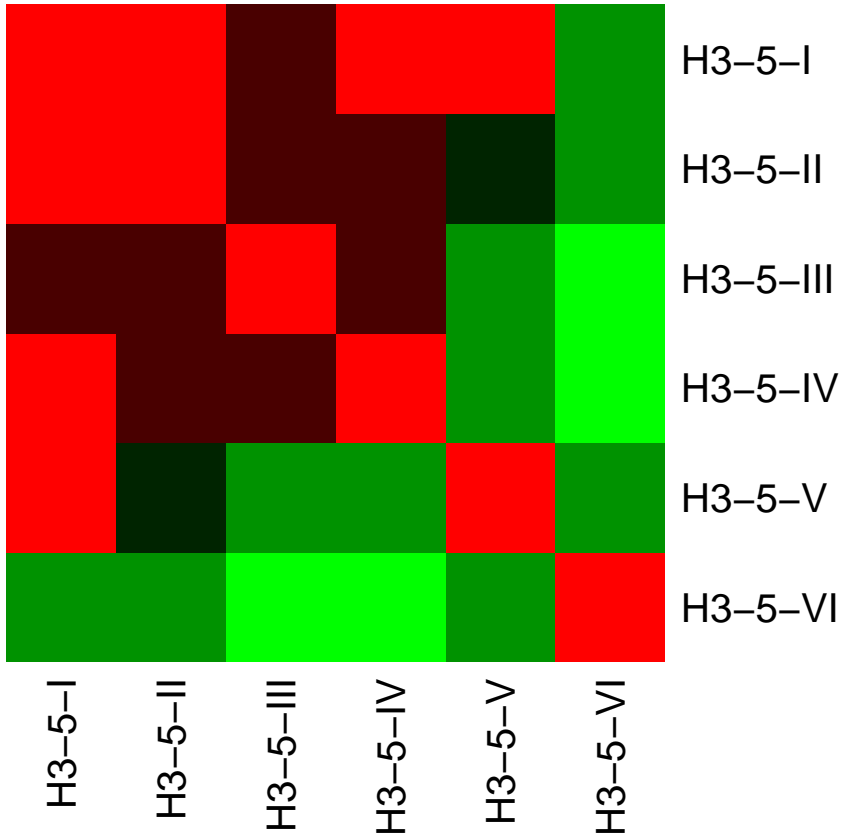



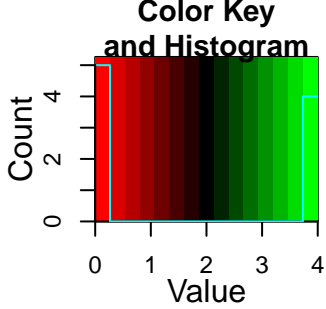

## H3-6residues

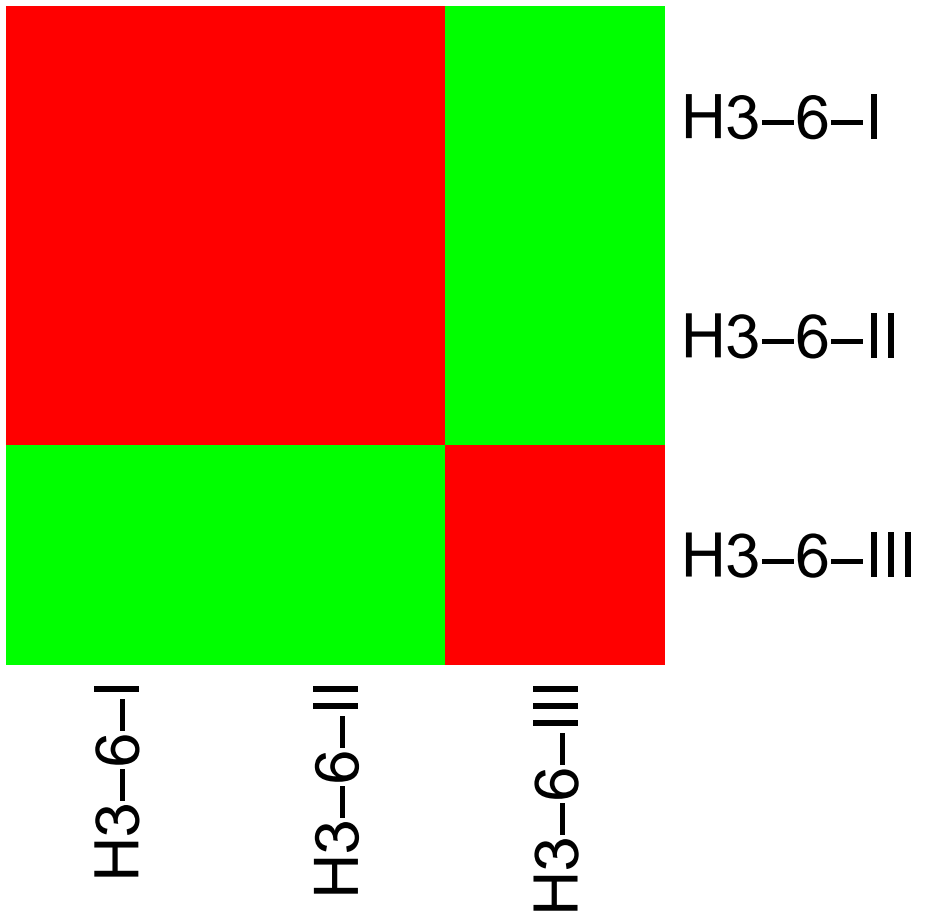

Color Key  
and Histogram

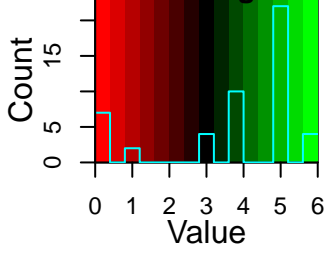

# H3-7residues

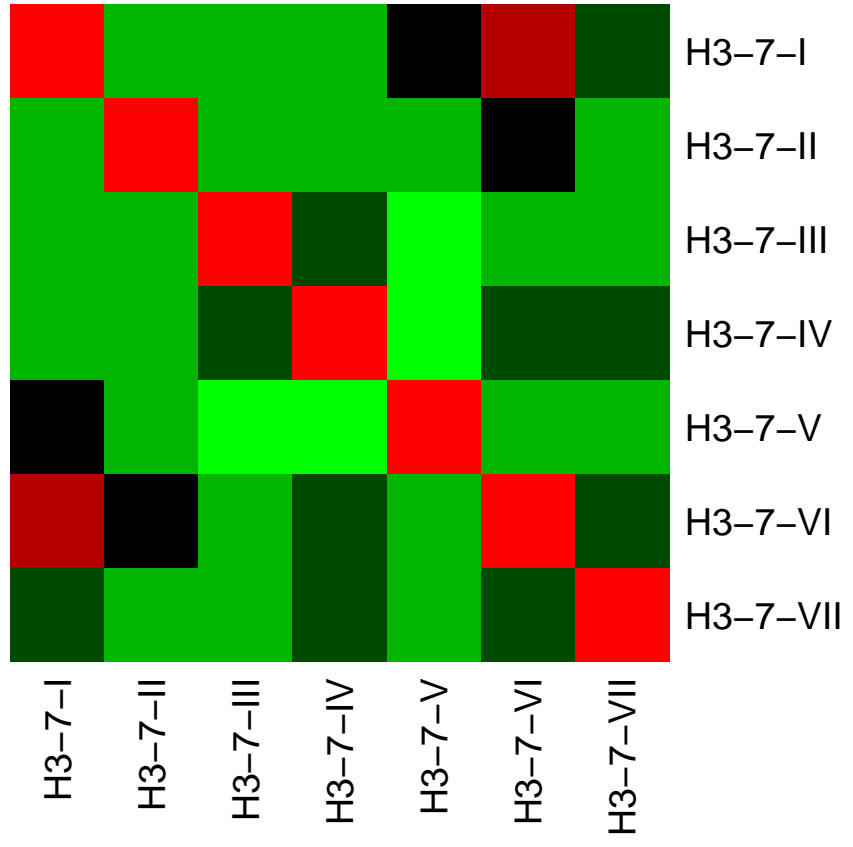

Color Key  
and Histogram

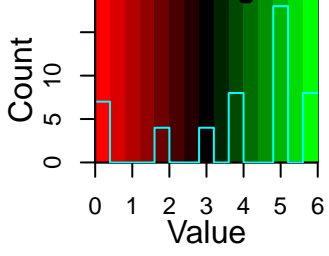

# H3-8residues

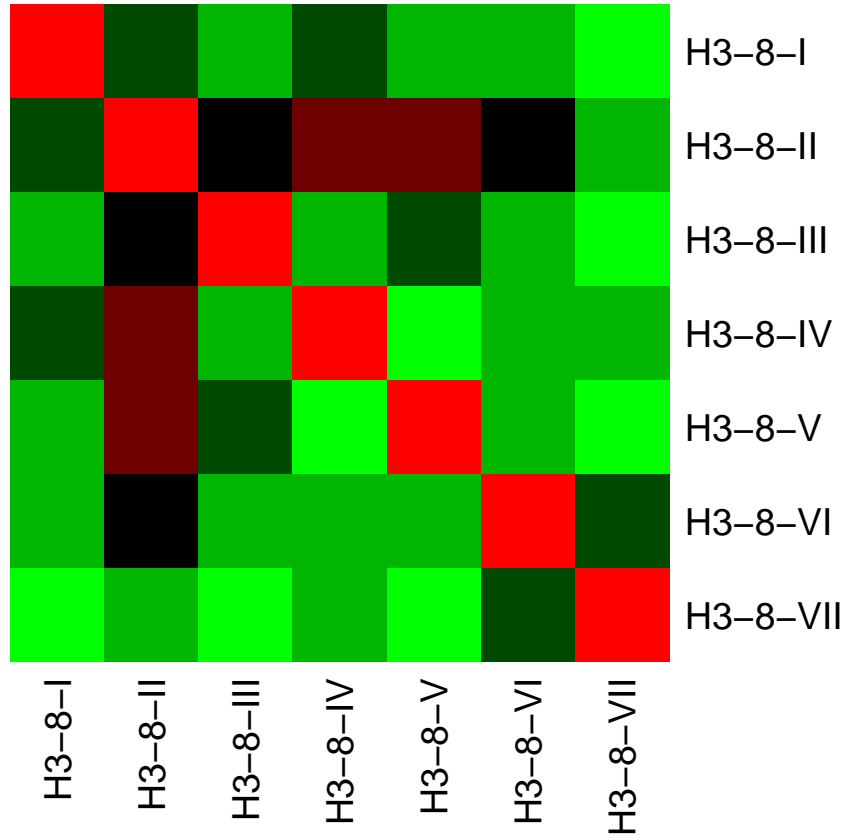

Color Key  
and Histogram

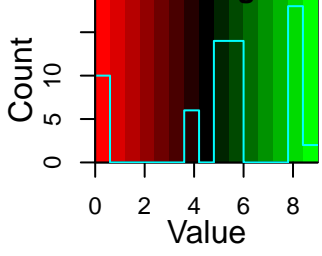

# H3-9residues

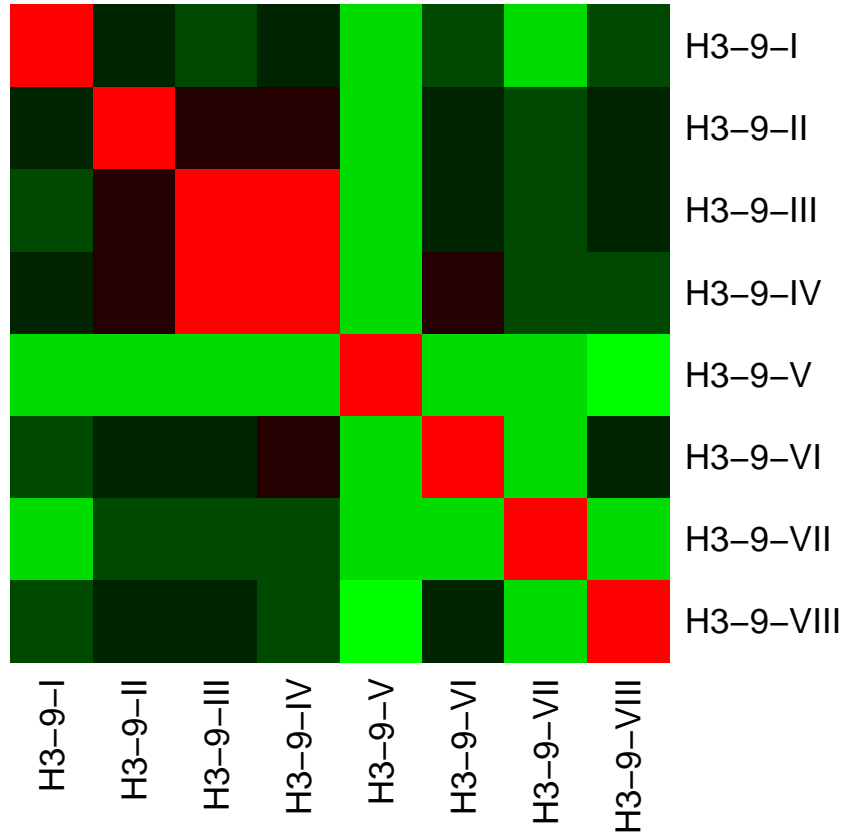

# Color Key and Histogram

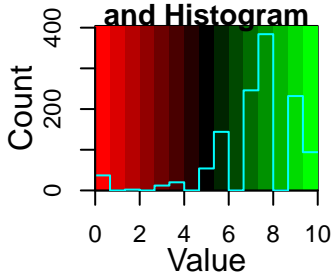

# H3-10residues

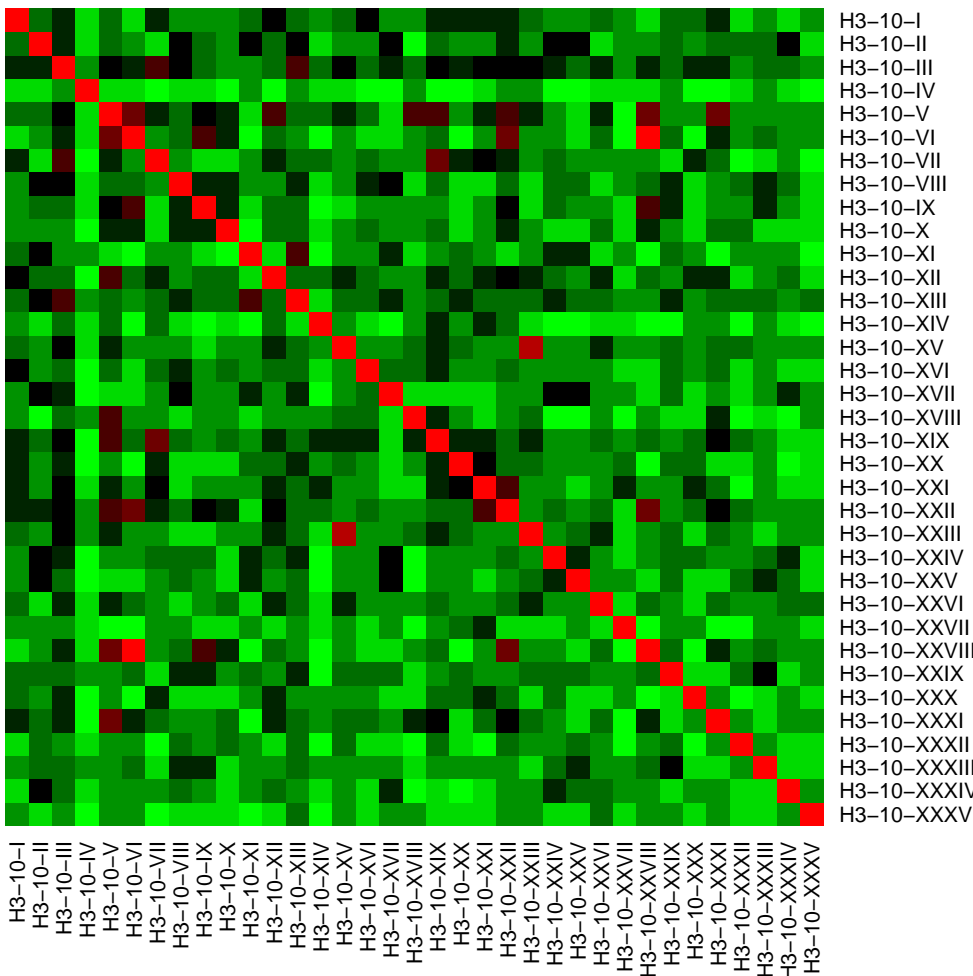

Color Key  
and Histogram

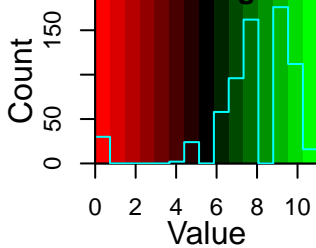

# H3-11residues

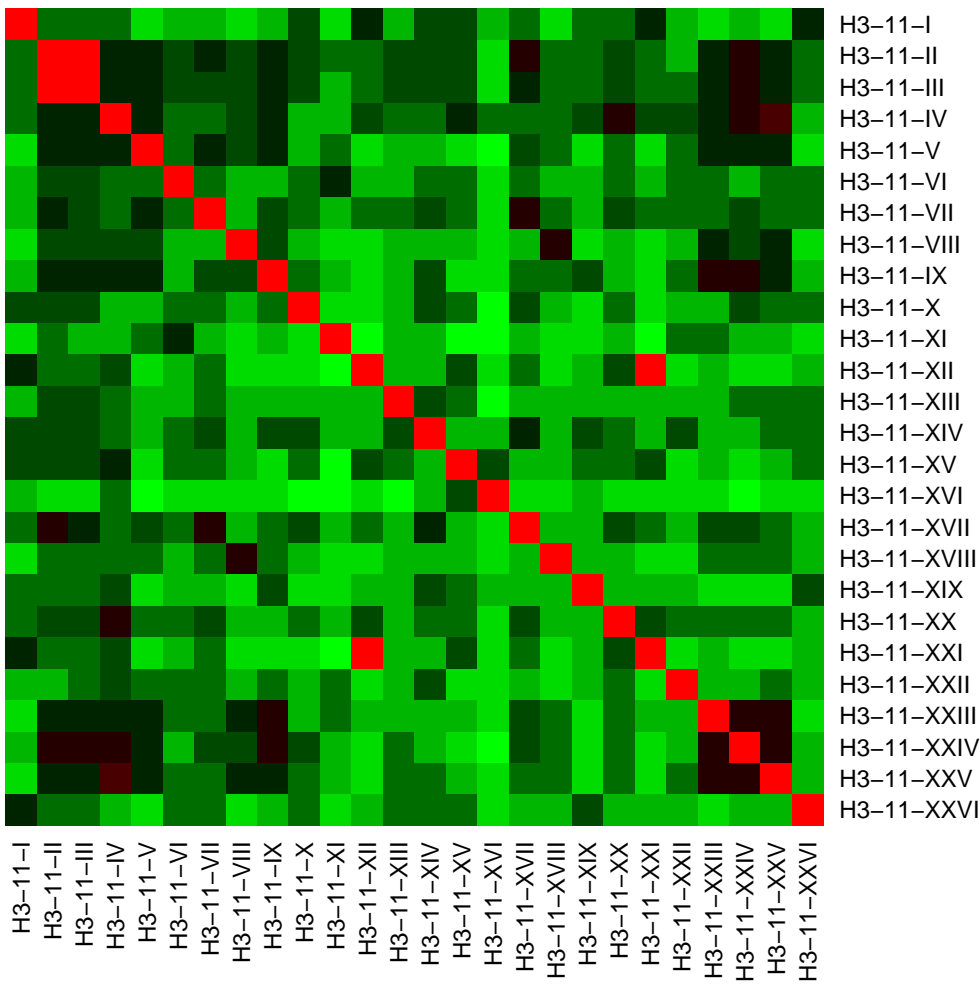

Color Key  
and Histogram

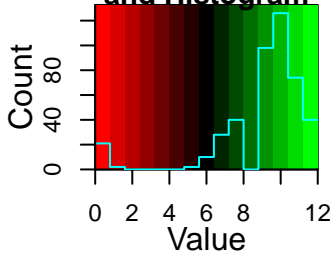

# H3-12residues

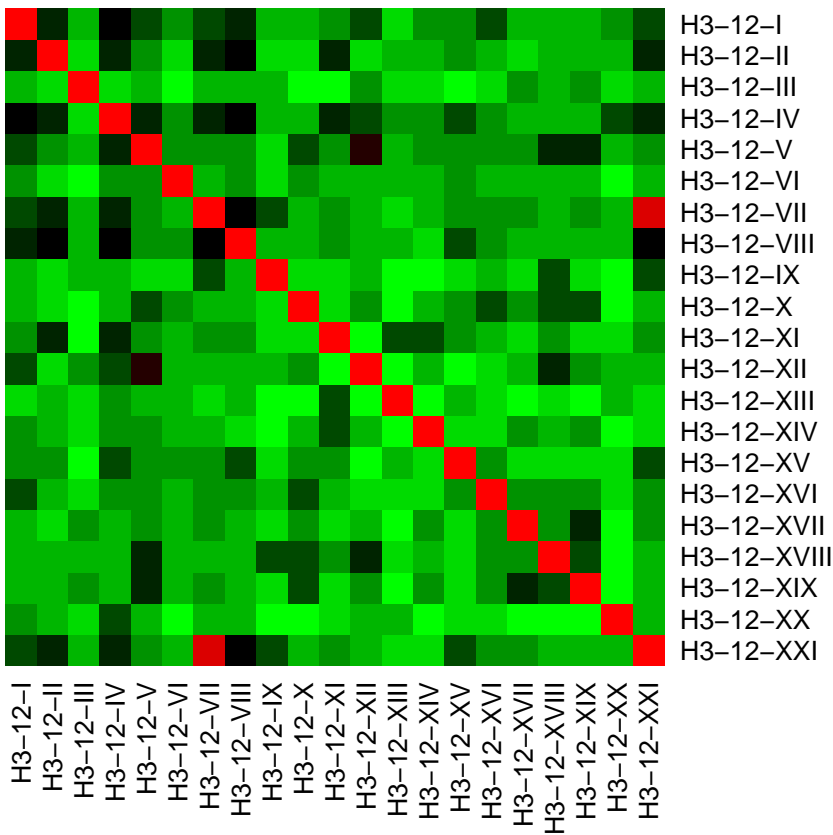

Color Key  
and Histogram

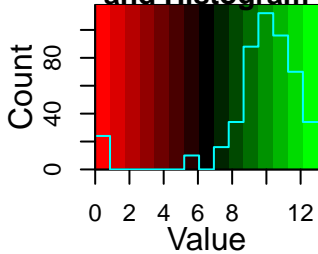

# H3-13residues

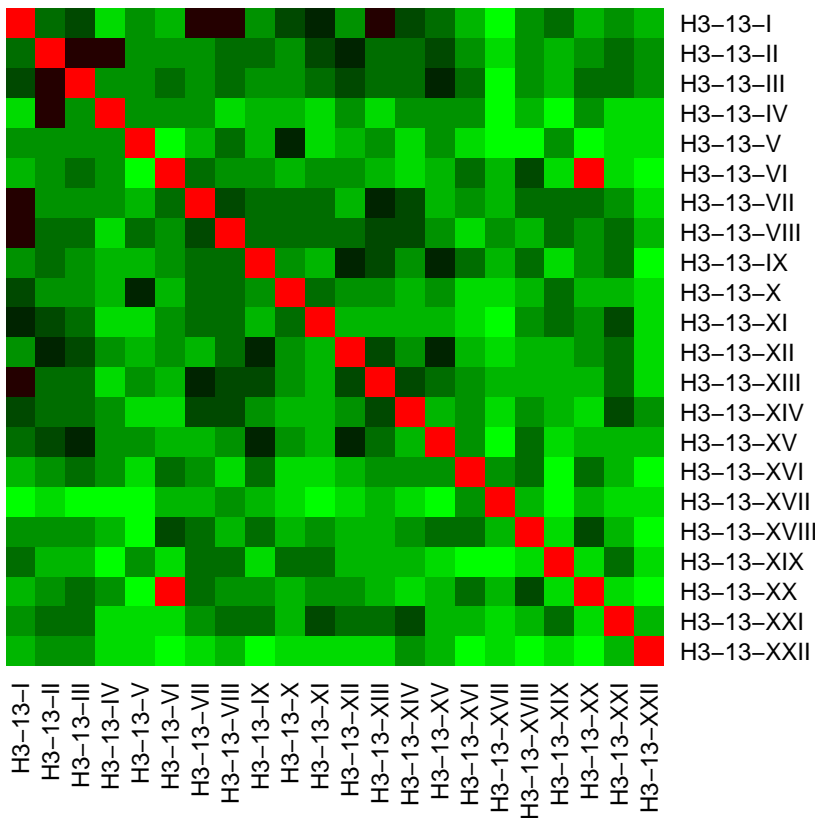



Color Key  
and Histogram

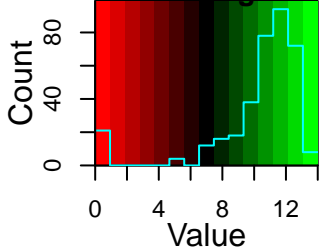

# H3-14residues

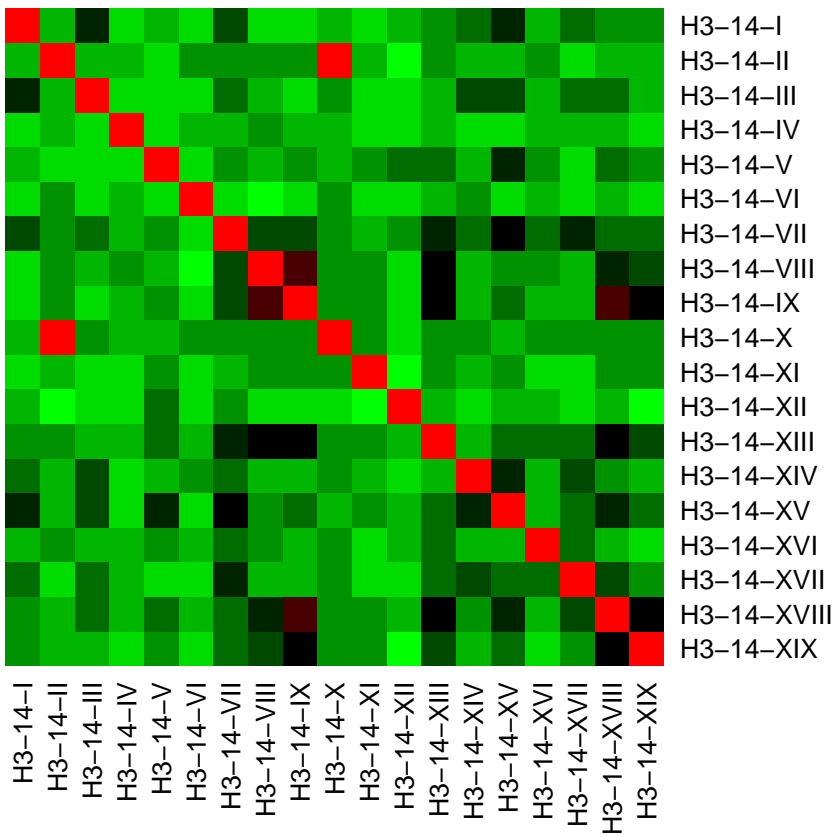

Color Key  
and Histogram

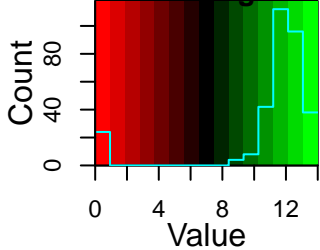

# H3-15residues

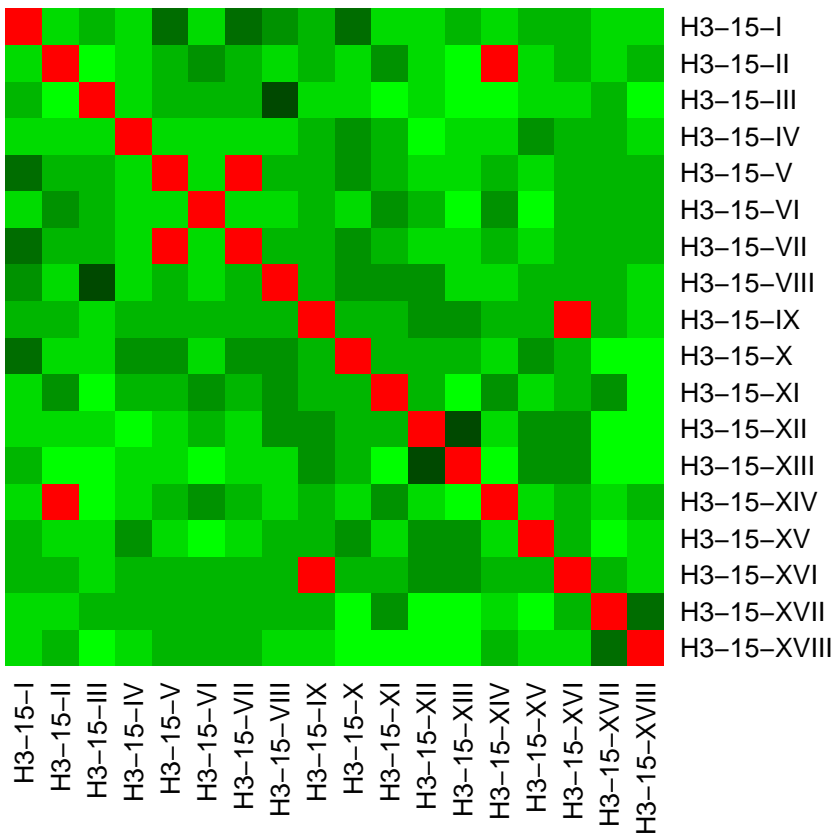

Color Key  
and Histogram

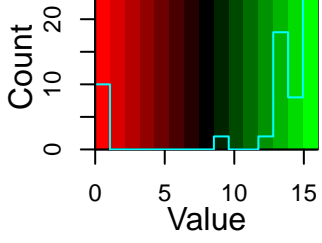

# H3-16residues

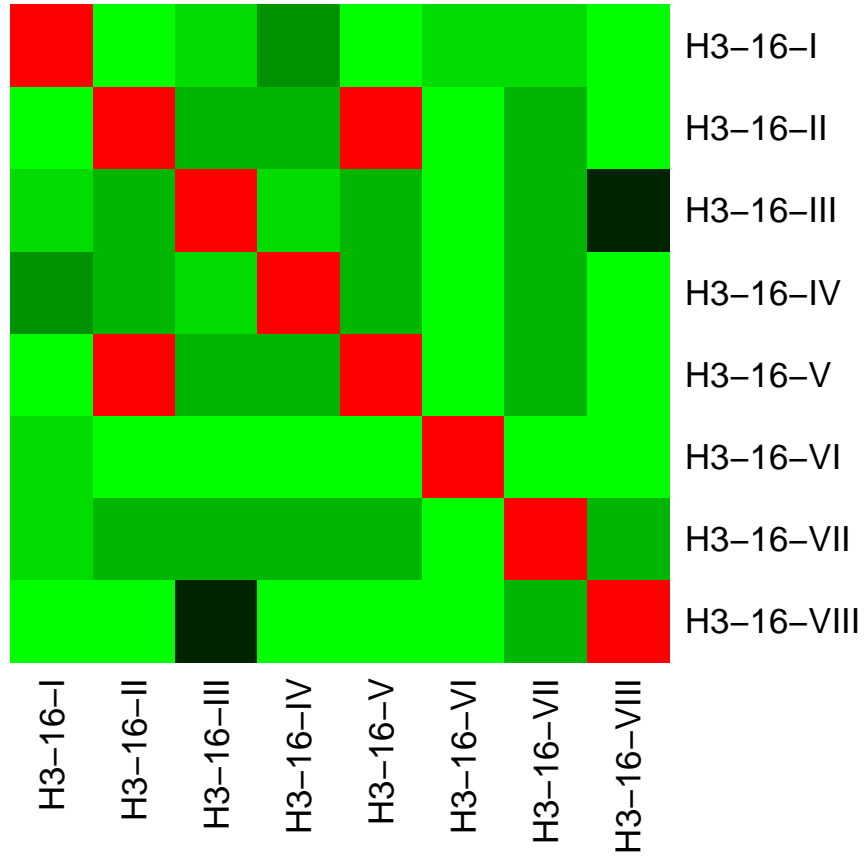

Color Key  
and Histogram

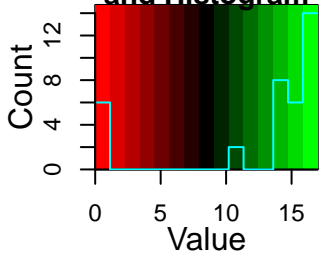

# H3-17residues

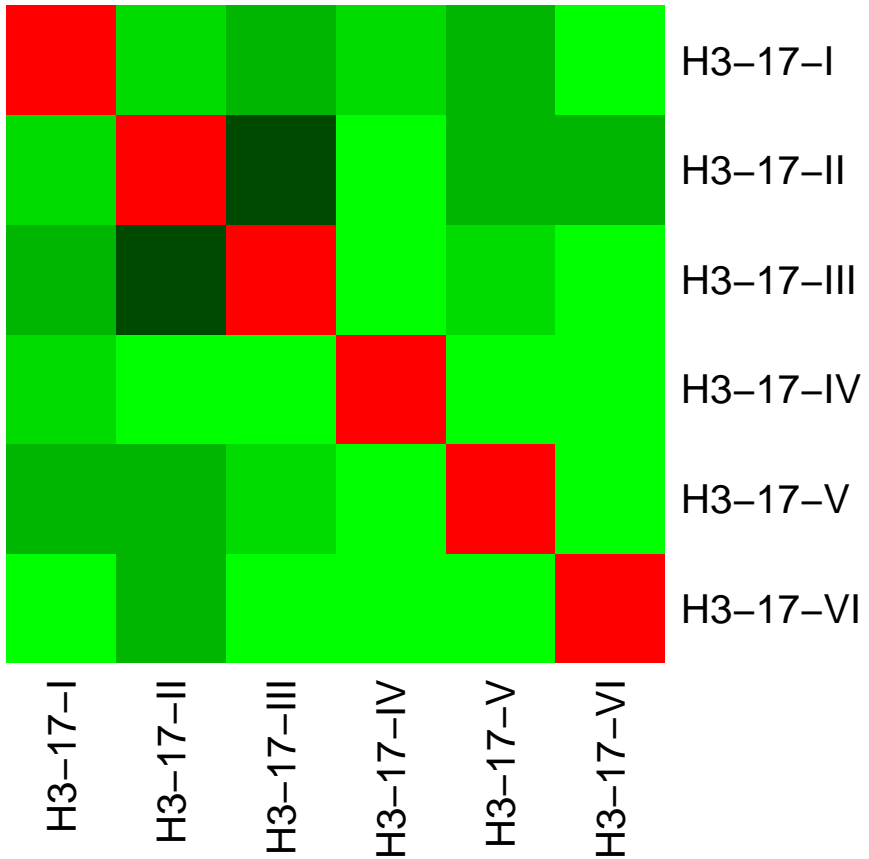

**Color Key  
and Histogram**

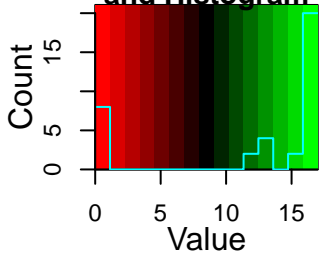

# H3-18residues

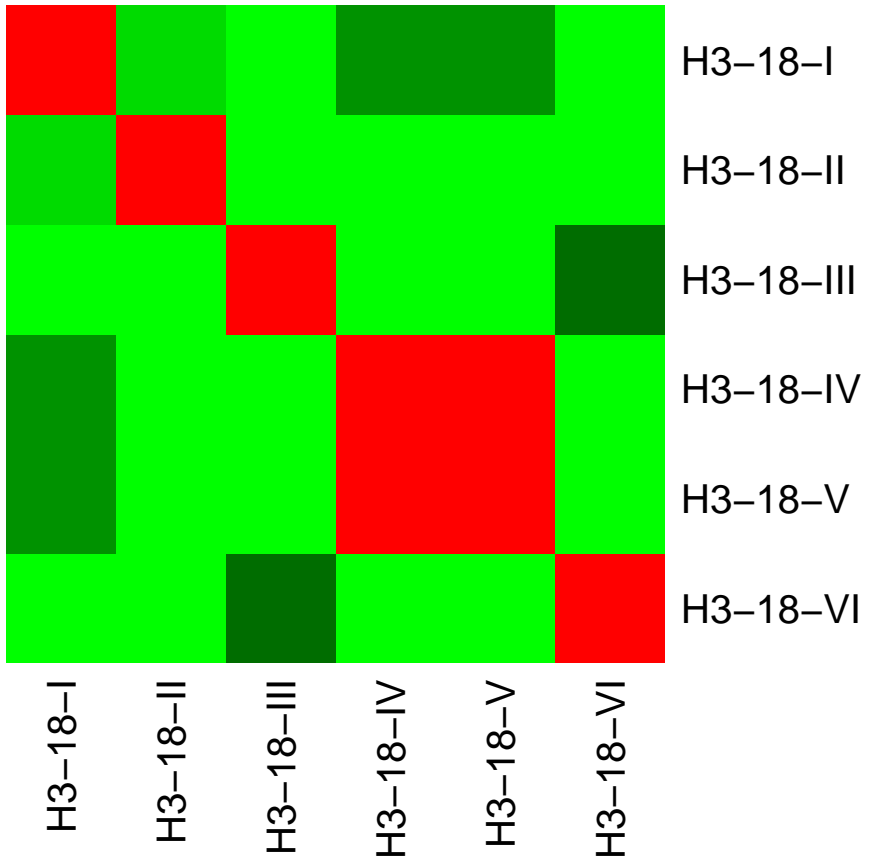

### Color Key

### and Histogram

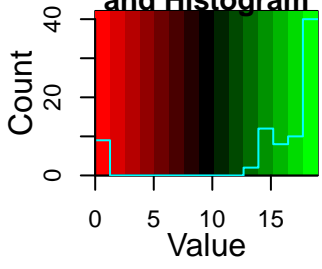

# H3-19residues

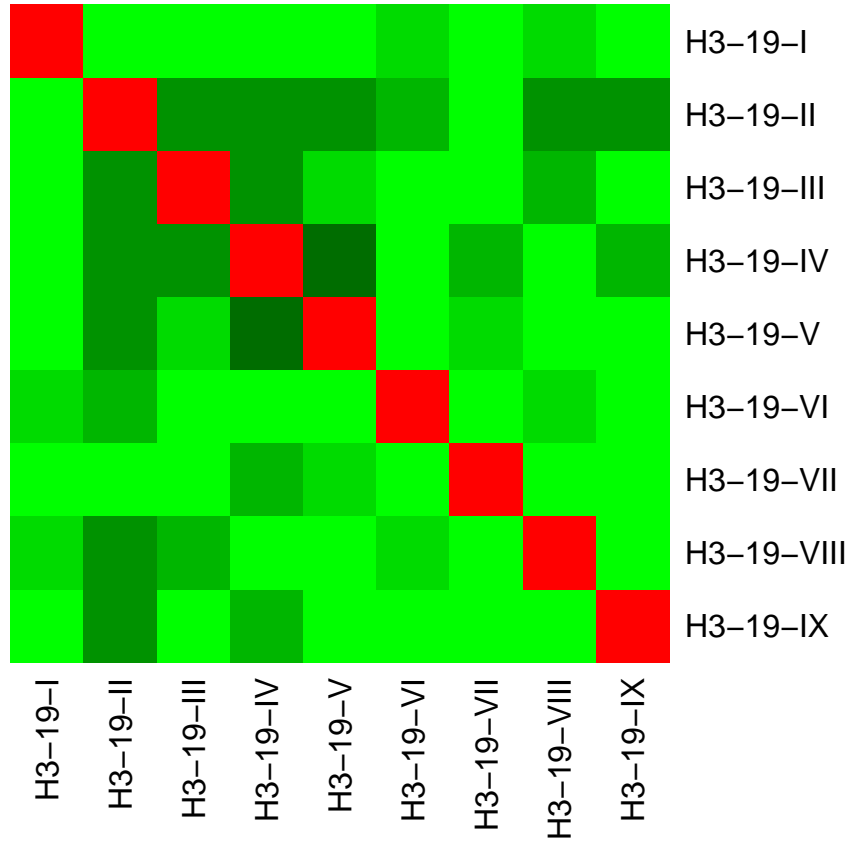

Color Key  
and Histogram

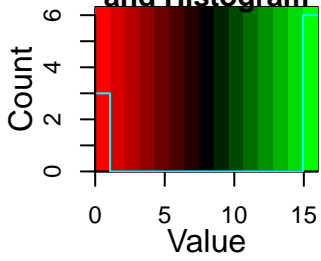

## H3-20residues

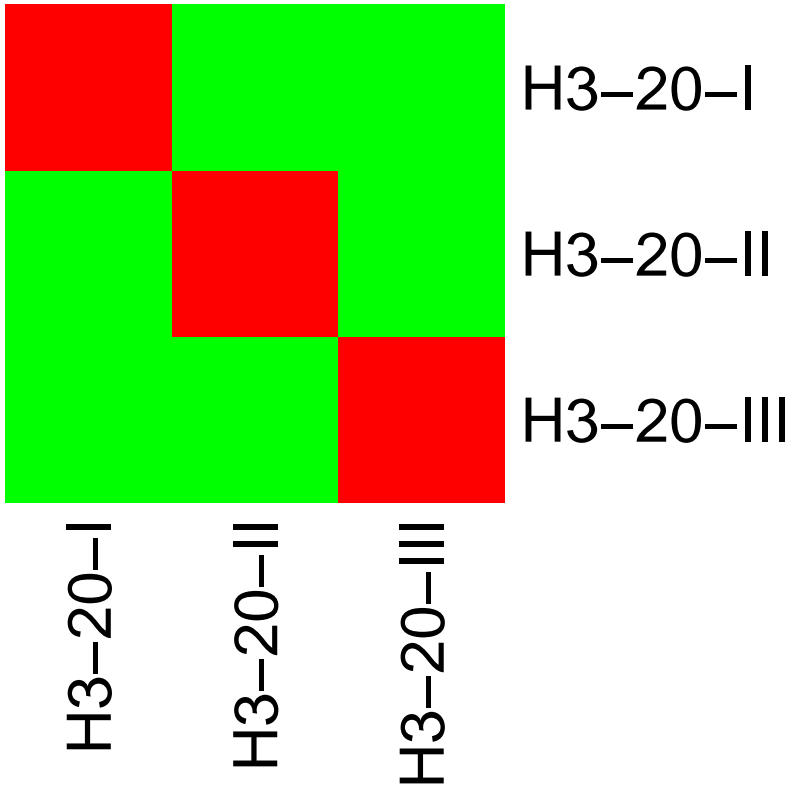

Color Key  
and Histogram

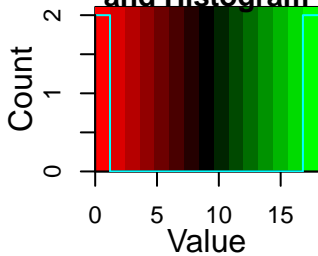

H3-22residues

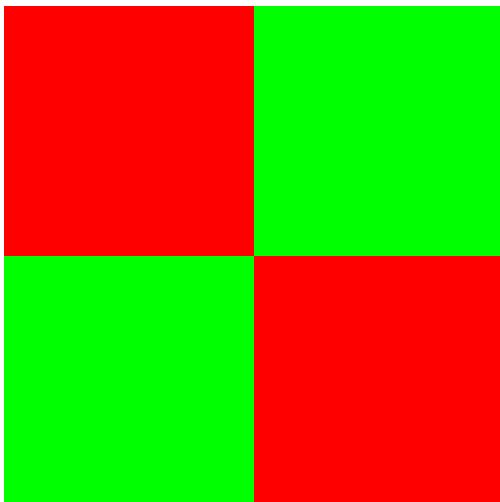

H3-22-I

H3-22-II

H3-22-I

H3-22-II



Color Key  
and Histogram

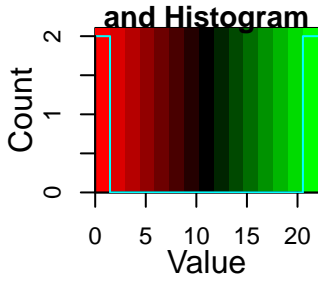

## H3-24residues

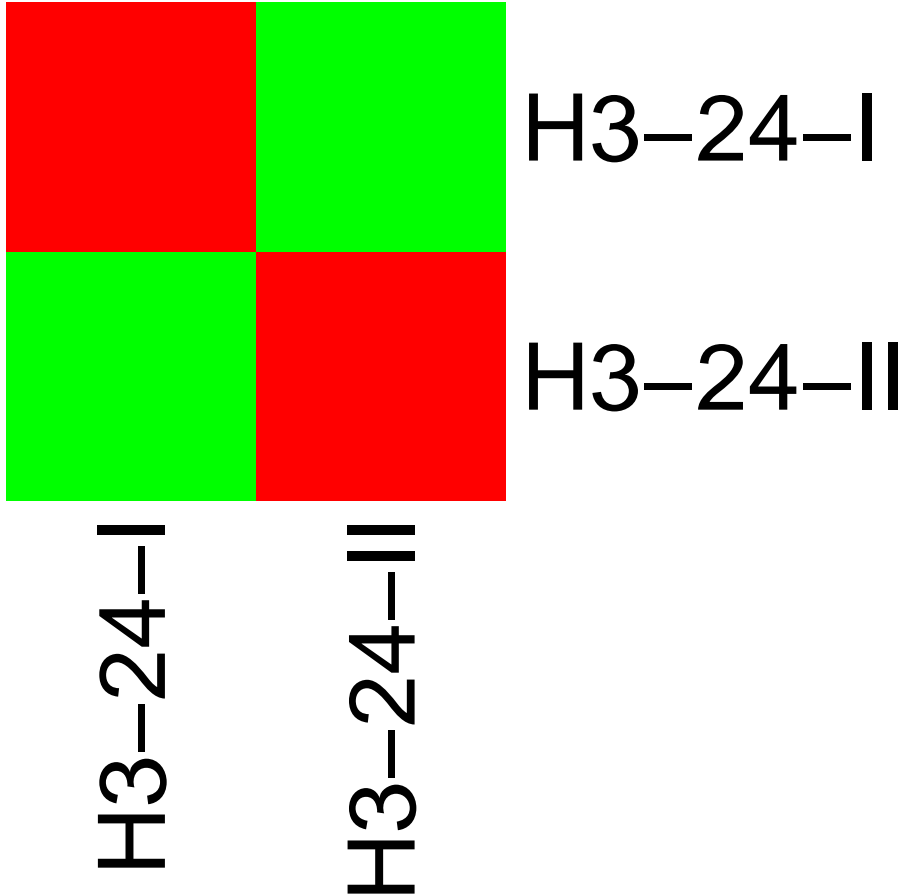

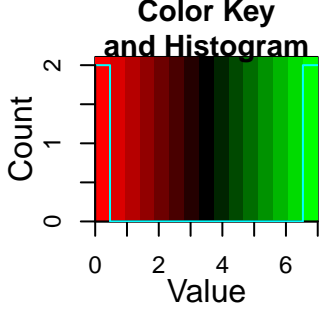

## L1-9residues

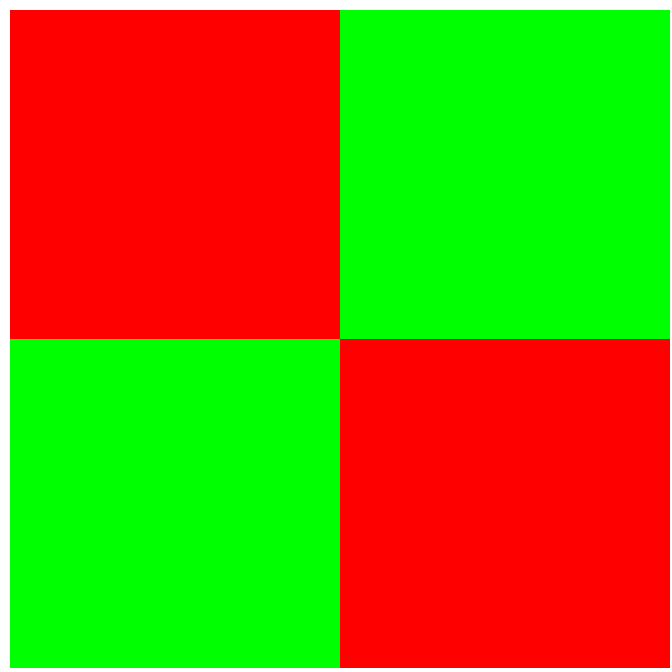

L1-9-I

L1-9-II

L1-9-I

L1-9-II

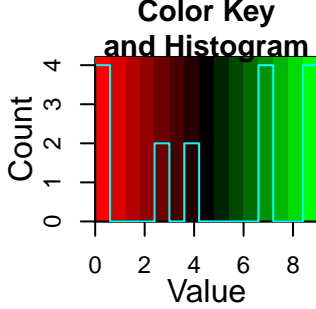

## L1-11residues

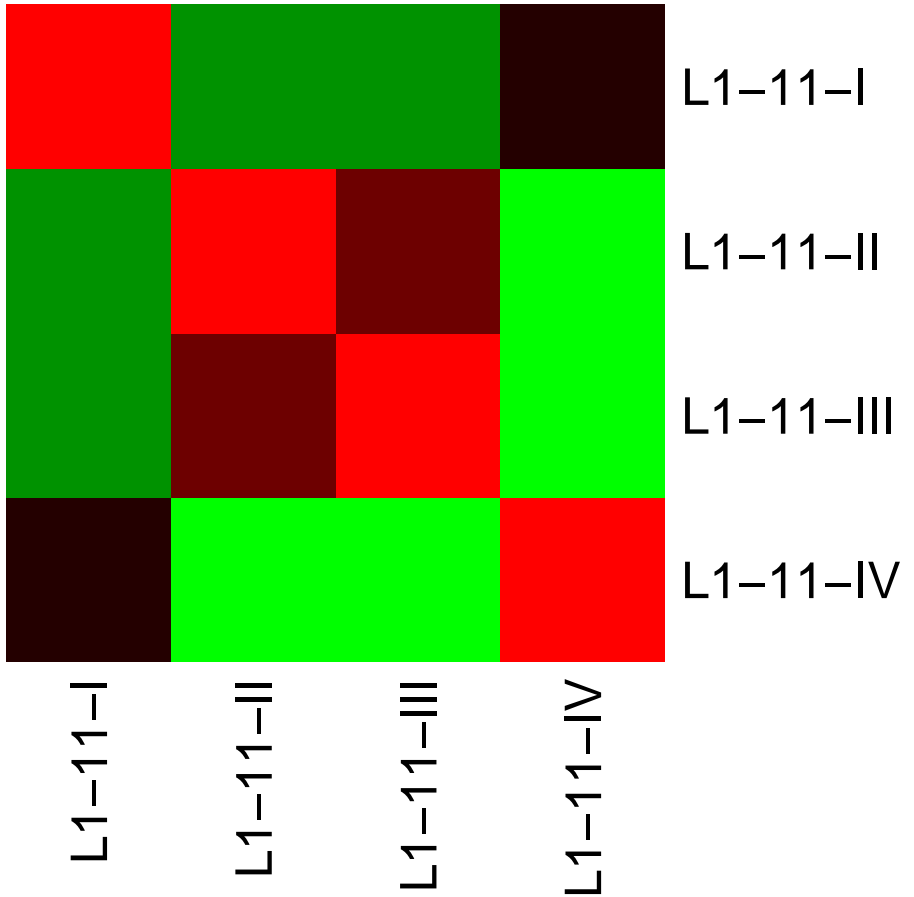

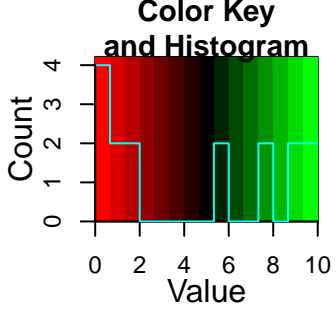

## L1-12residues

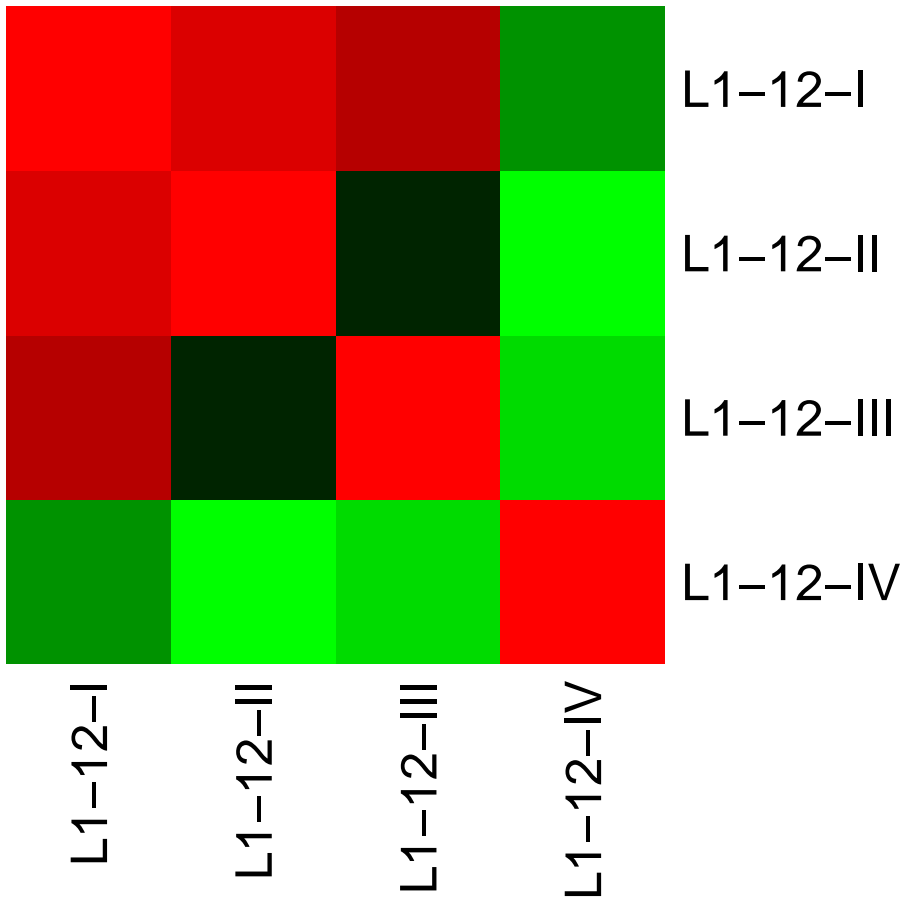

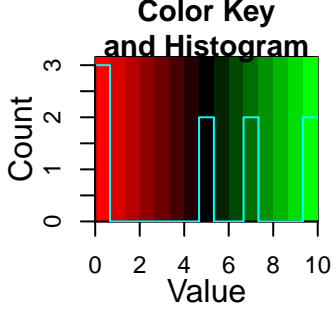

## L1-13residues

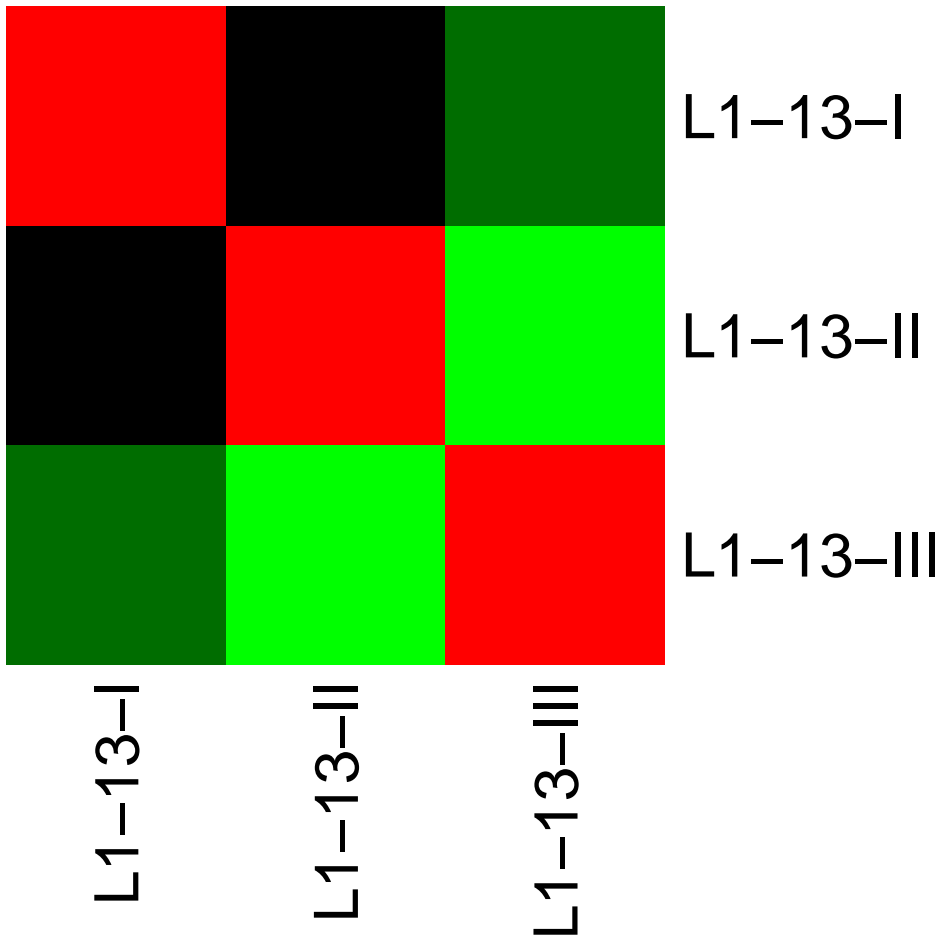

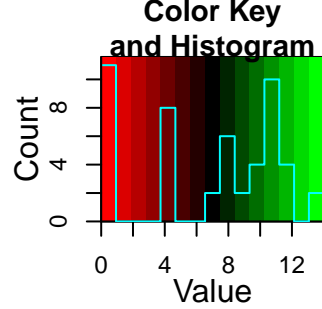

# L1-14residues

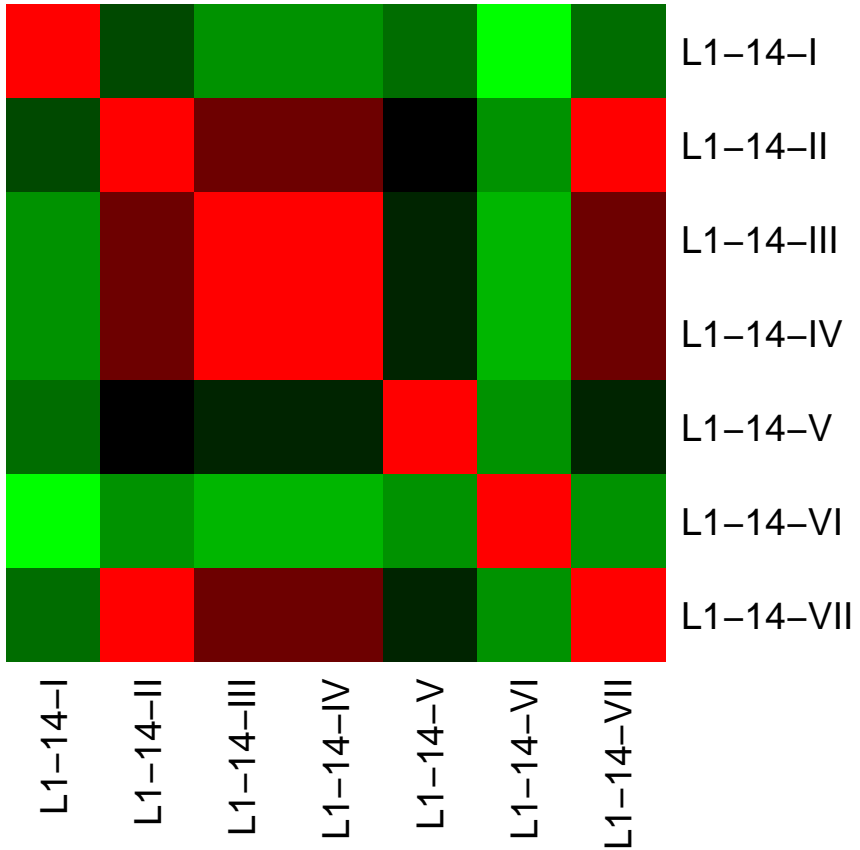

Color Key  
and Histogram

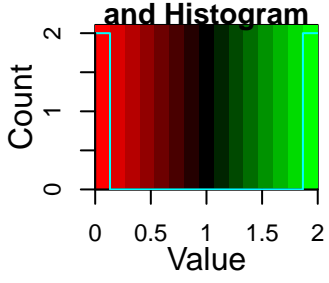

# L1-15residues

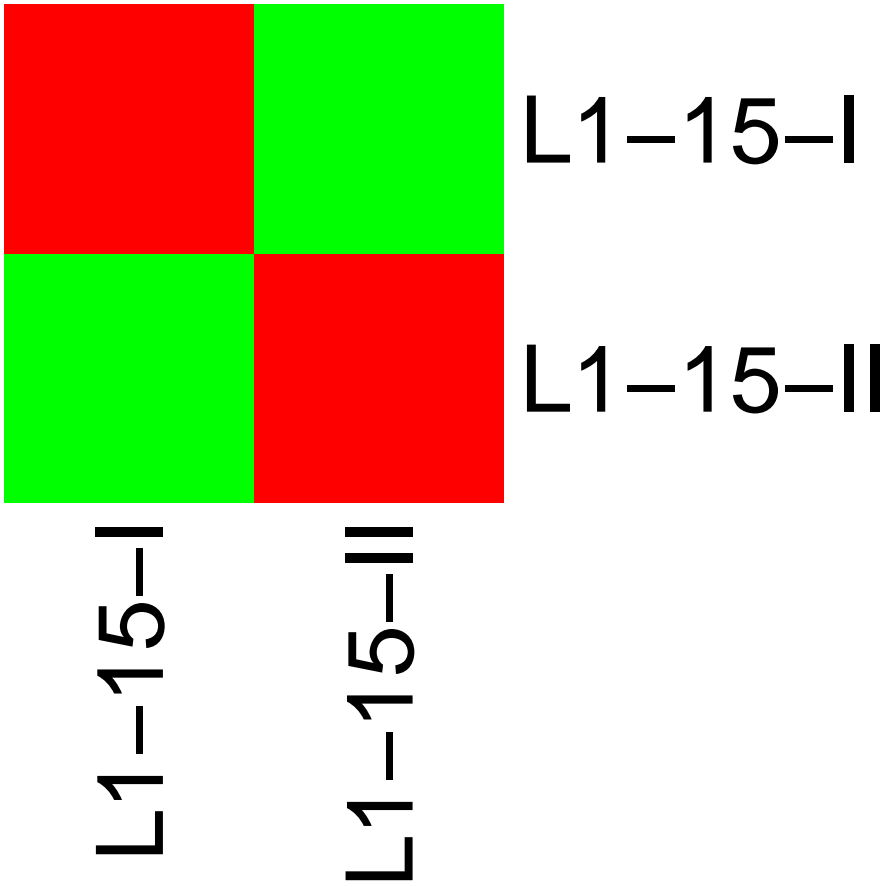

Color Key  
and Histogram

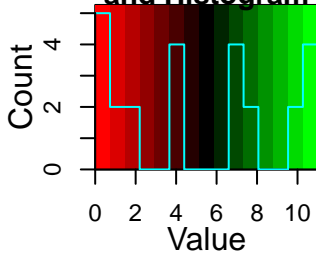

# L1-16residues

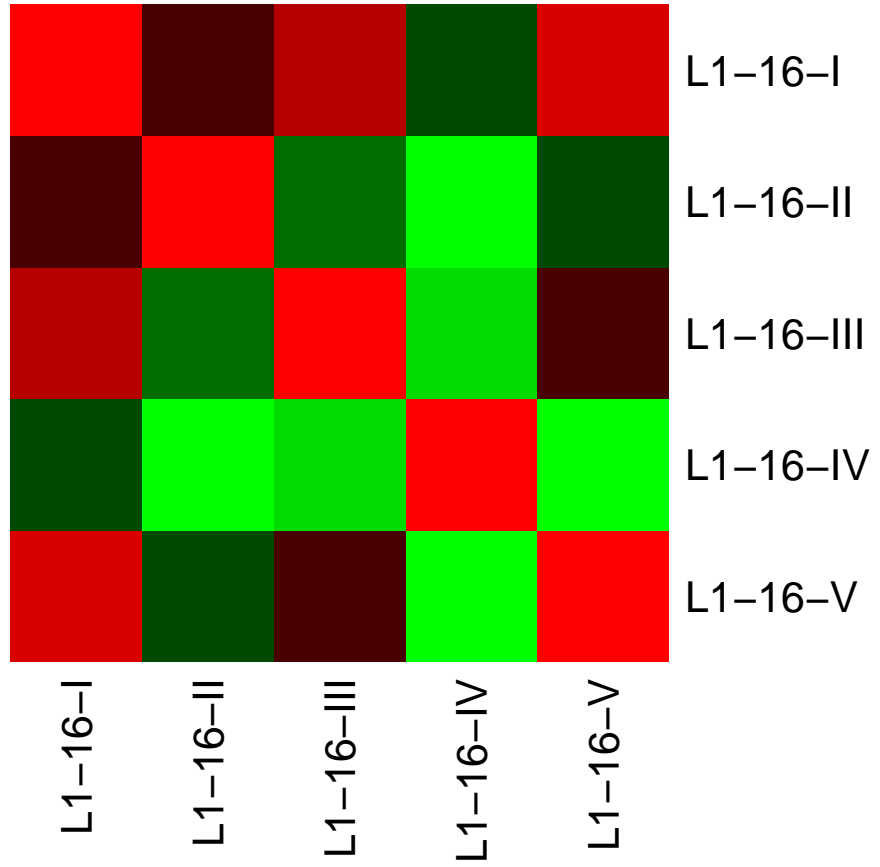



Color Key  
and Histogram

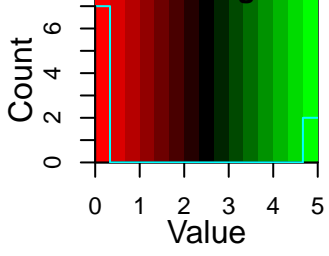

# L2-7residues

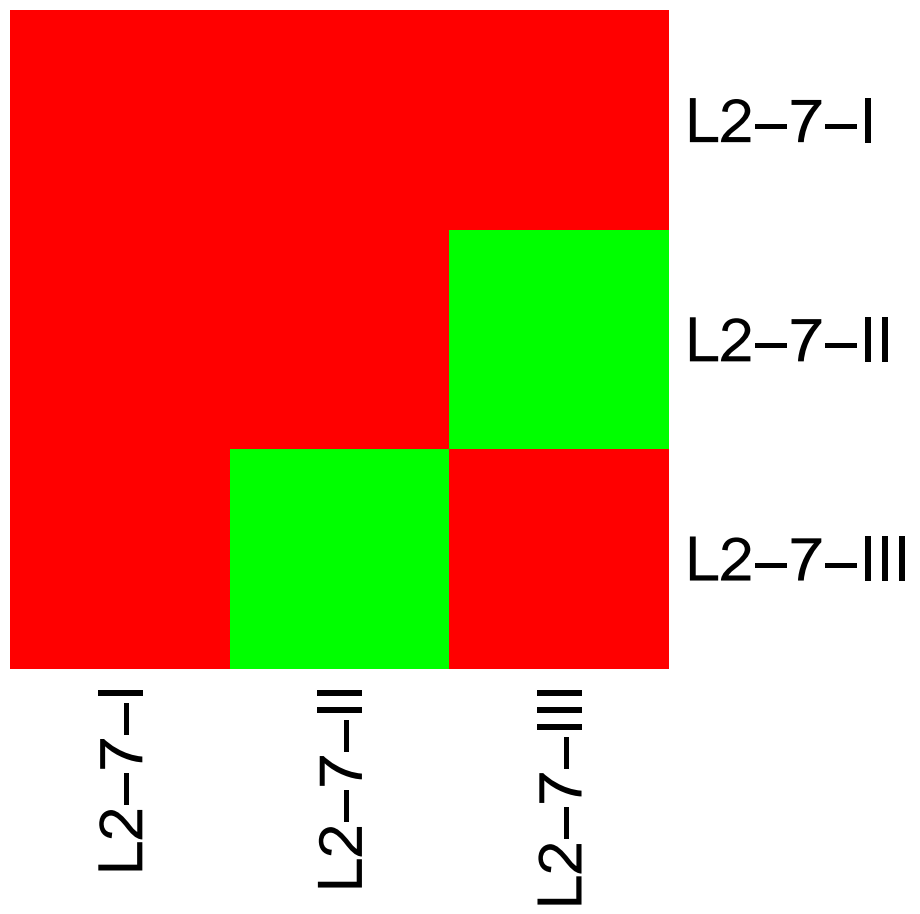

Color Key  
and Histogram

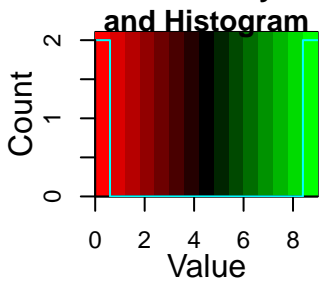

# L2-11residues

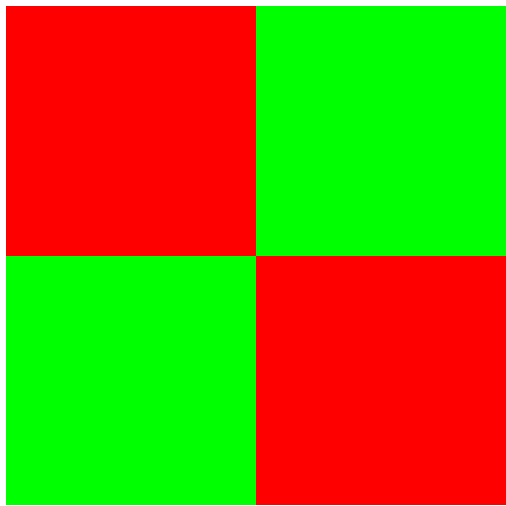

L2-11-I

L2-11-II

L2-11-I

L2-11-II

### Color Key

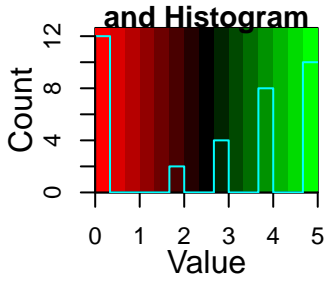

## L3-8residues

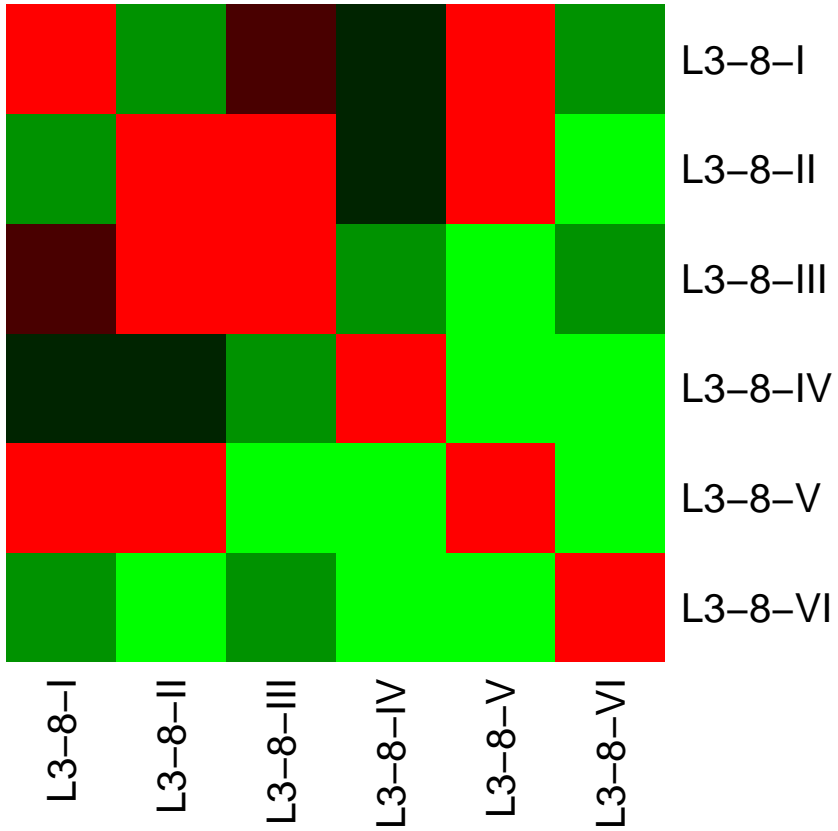

**Color Key  
and Histogram**

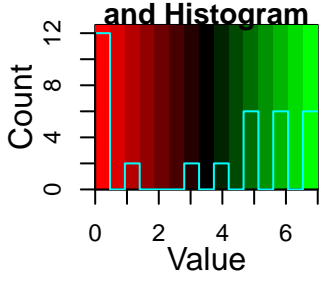

# L3-9residues

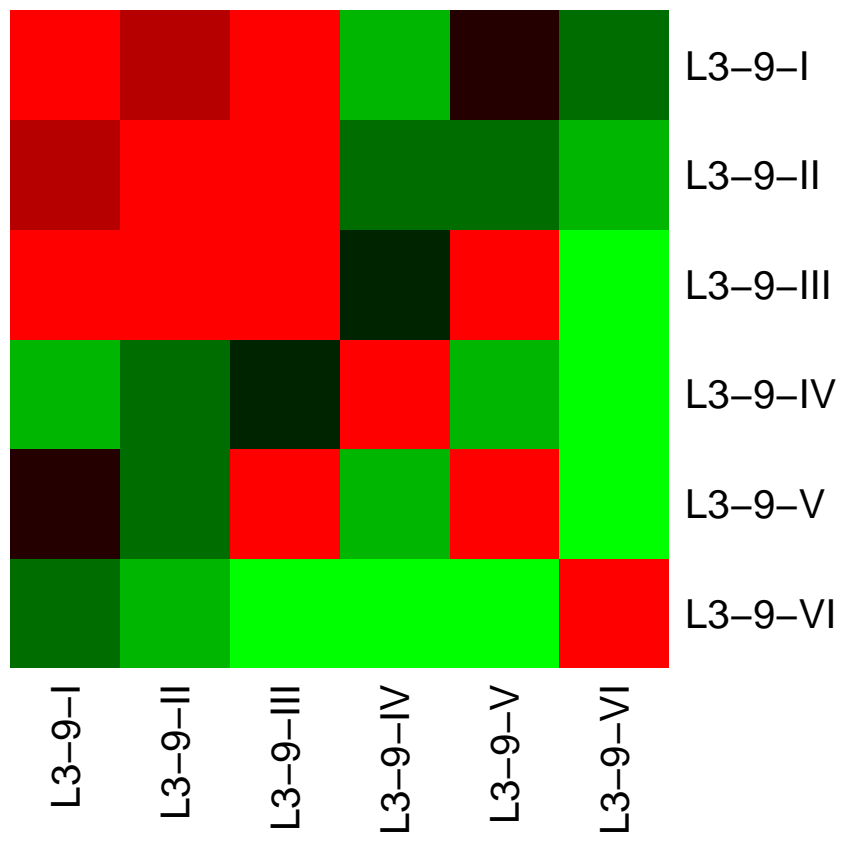

# Color Key

## and Histogram

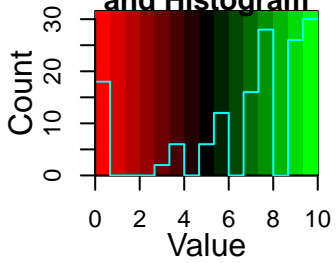

# L3-10residues

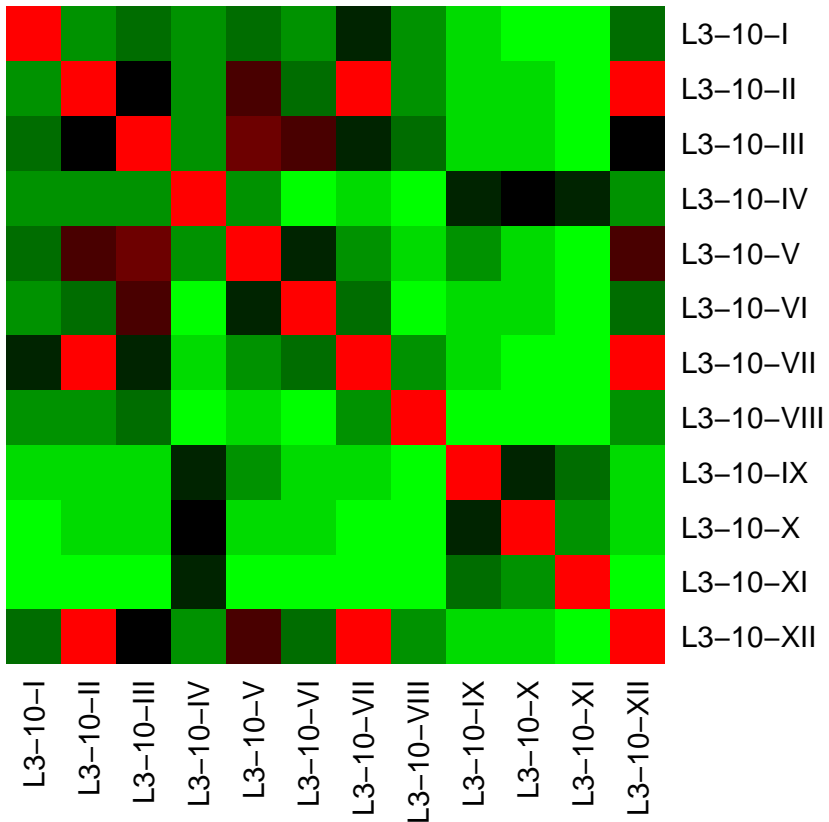



Color Key  
and Histogram

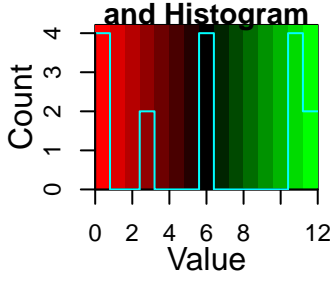

# L3-12residues

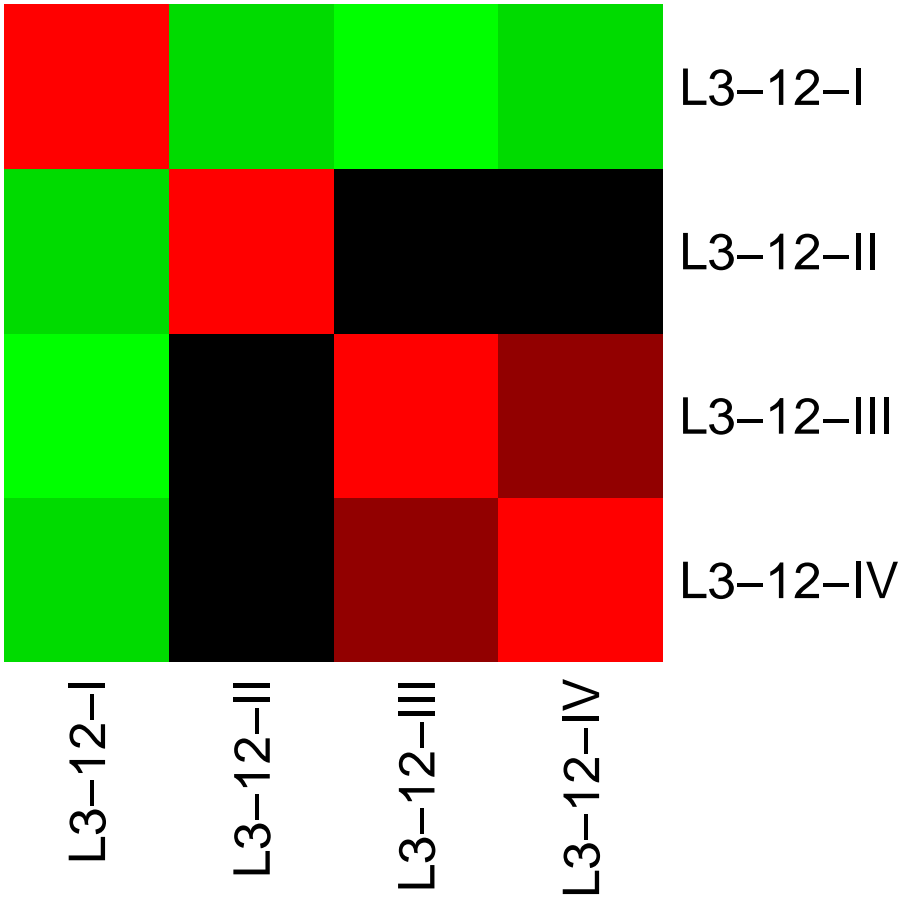

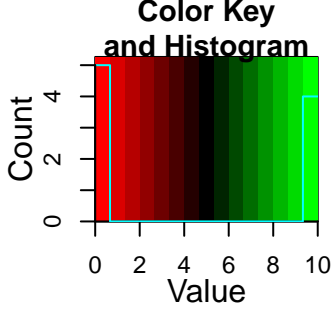

## L3-13residues

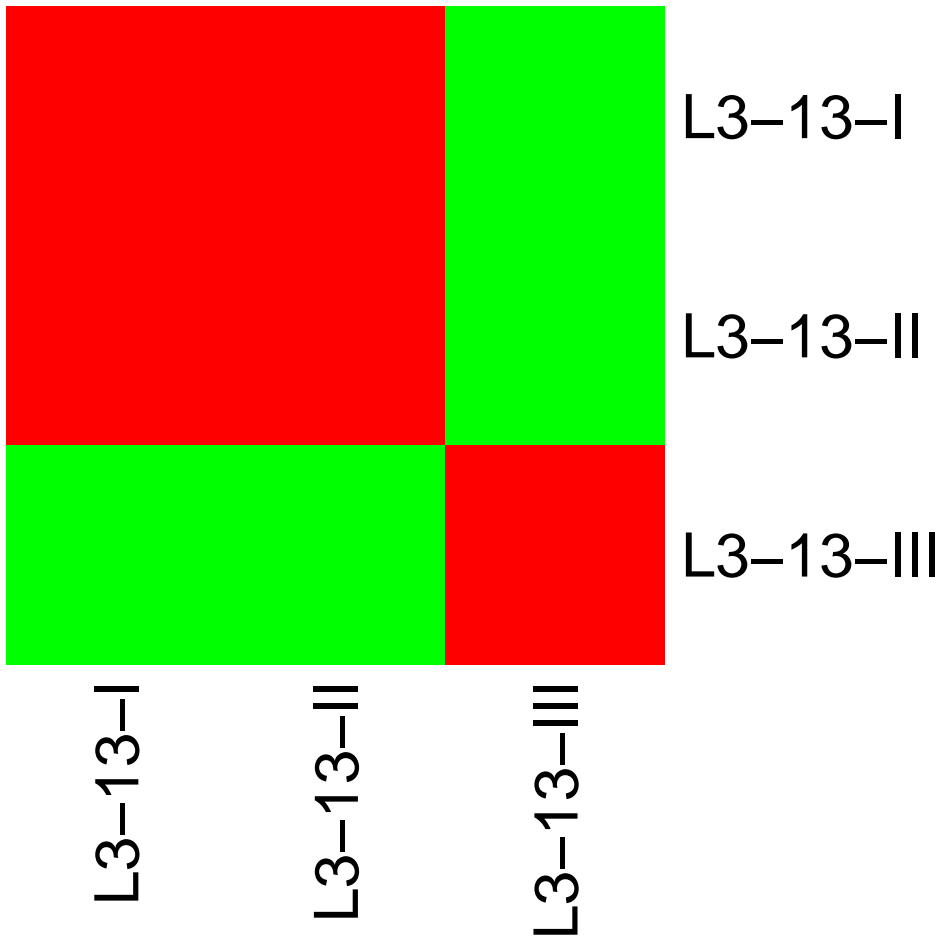

Supplement: all_mSD_Heatmaps_V2.pdf [file all_mSD_Heatmaps_V2.pdf]
